# Supplementary material for: Using facial recognition technology in the exploration of student responses to conceptual conflict phenomenon
Source: Royal Society of Chemistry journal article supplement (doi:10.1039/c4rp00103f), 2014-01-01
Supplement: c4rp00103f2.pdf [file c4rp00103f2.pdf]

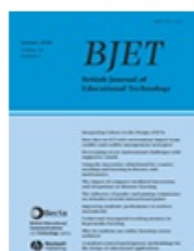

**Title:** The role of facial microexpression state (FMES) change in the process of conceptual conflict

**Author:** Mei-Hung Chiu,Chin-Cheng Chou,Wen-Lung Wu,Hongming Liaw

**Publication:** British Journal of Educational Technology

**Publisher:** John Wiley and Sons

**Date:** Dec 19, 2013

© 2013 British Educational Research Association

Logged in as:

Hongming Liaw

LOGOUT

### Order Completed

Thank you very much for your order.

This is a License Agreement between Hongming Liaw ("You") and John Wiley and Sons ("John Wiley and Sons"). The license consists of your order details, the terms and conditions provided by John Wiley and Sons, and the [payment terms and conditions](#).

[Get the printable license.](#)

|                                                                                            |                                                                                              |
|--------------------------------------------------------------------------------------------|----------------------------------------------------------------------------------------------|
| License Number                                                                             | 3452230375372                                                                                |
| License date                                                                               | Aug 18, 2014                                                                                 |
| Licensed content publisher                                                                 | John Wiley and Sons                                                                          |
| Licensed content publication                                                               | British Journal of Educational Technology                                                    |
| Licensed content title                                                                     | The role of facial microexpression state (FMES) change in the process of conceptual conflict |
| Licensed copyright line                                                                    | © 2013 British Educational Research Association                                              |
| Licensed content author                                                                    | Mei-Hung Chiu,Chin-Cheng Chou,Wen-Lung Wu,Hongming Liaw                                      |
| Licensed content date                                                                      | Dec 19, 2013                                                                                 |
| Start page                                                                                 | 471                                                                                          |
| End page                                                                                   | 486                                                                                          |
| Type of use                                                                                | Journal/Magazine                                                                             |
| Requestor type                                                                             | Author of this Wiley article                                                                 |
| Is the reuse sponsored by or associated with a pharmaceutical or medical products company? | no                                                                                           |
| Format                                                                                     | Print and electronic                                                                         |
| Portion                                                                                    | Figure/table                                                                                 |
| Number of figures/tables                                                                   | 2                                                                                            |
| Original Wiley figure/table number(s)                                                      | Figure 2                                                                                     |
| Will you be translating?                                                                   | No                                                                                           |
| Title of new article                                                                       | The role of facial microexpression state (FMES) change in the process of conceptual conflict |
| Publication the new article is in                                                          | Chemical Education Research and Practice                                                     |
| Publisher of new article                                                                   | Royal Society of Chemistry                                                                   |
| Author of new article                                                                      | Hongming Liaw, Mei-Hung Chiu, Chin-Cheng Chou                                                |
| Expected publication date of new article                                                   | Dec 2014                                                                                     |
| Estimated size of new article (pages)                                                      | 30                                                                                           |
| Total                                                                                      | 0.00 USD                                                                                     |

ORDER MORE

CLOSE WINDOW

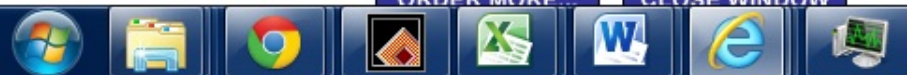

EN

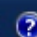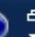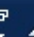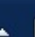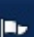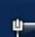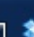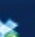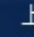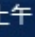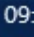

上午 09:53

2014/8/19
